# Supplementary material for: A multifunctional platinum(iv) and cyanine dye-based polyprodrug for trimodal imaging-guided chemo–phototherapy
Source: Royal Society of Chemistry journal article supplement (doi:10.1039/d1tb02682h), 2022-01-01
Supplement: d1tb02682h1.pdf [file d1tb02682h1.pdf]

## <sup>1</sup>Supporting Information

### **Multifunctional Platinum(IV) and Cyanine Dye-based Polyprodrug for Trimodal Imaging-Guided Chemo-Phototherapy**

Shuying Li,<sup>1</sup> Yanjuan Wu,<sup>\*1</sup> Siyuan Liu,<sup>1</sup> Ting Wu,<sup>2</sup> Guozheng Liu,<sup>1</sup> Tianduo Li,<sup>1</sup> and Zhaowei Chen<sup>\*2,3</sup>

<sup>1</sup>Shandong Provincial Key Laboratory of Molecular Engineering, School of Chemistry and Chemical Engineering, Qilu University of Technology (Shandong Academy of Sciences), Jinan 250353, China; wuyanjuan5@qlu.edu.cn (Y.W.)

<sup>2</sup>Institute of Food Safety and Environment Monitoring, College of Chemistry, Fuzhou University, Fuzhou 350108, P. R. China; chenzw@fzu.edu.cn (Z.C.)

<sup>3</sup>College of Pharmaceutical Sciences, Zhejiang University, Hangzhou, P. R. China; E-mail: zchen88@zju.edu.cn

#### **Synthesis of cis, cis, trans-[Pt(NH<sub>3</sub>)<sub>2</sub>Cl<sub>2</sub>(OH)<sub>2</sub>] (DHP)**

According to reports in the literature, cisplatin (1.0 g, 3.33 mmol), ultrapure water (10mL) and 10mL hydrogen peroxide (H<sub>2</sub>O<sub>2</sub>, 30%) were added to a 50 mL flask and stirred for 12 h in the dark. After the filtration, the obtained solid (DHP) was washed with ultrapure water and ice-cold acetone for several times, dried in vacuum to obtain a light yellow powder solid.

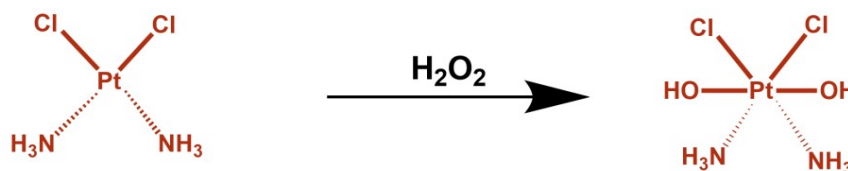

**Scheme S1.** Synthetic scheme of the DHP.

#### **Synthesis of HO-Cy-OH (Cy)**

For the preparation of Cy, according to the literature reports, 2,3,3-trimethylindolenine (3 g, 18.9 mmol) and 2-bromoethanol (2.83 g, 22.7 mmol) and 80 mL of anhydrous acetonitrile

were reacted to obtain a pink solid 1-(3-hydroxyethyl)-2,3,3-trimethyl-3H-indol-1-ium. Then, Cyclohexanone (5 g, 51 mmol) and POCl<sub>3</sub> (20 mL) were reacted to obtain a yellow solid, 1-cyclohexene-1-carboxaldehyde. 1-cyclohexene-1-carboxaldehyde (1.73 g, 10 mmol), 1-(3-hydroxypropyl)-2,3,3-trimethyl-3H-indol-1-ium (5.735 g, 20 mmol) was dissolved in anhydrous n-butanol (70 mL) and toluene (30 mL), after 12 h of the reaction, the solvent was separated and collected by an oil-water separation device, and after cooling to room temperature, the crude product is separated and purified by a chromatographic column to obtain HO-cy-OH (Cy).

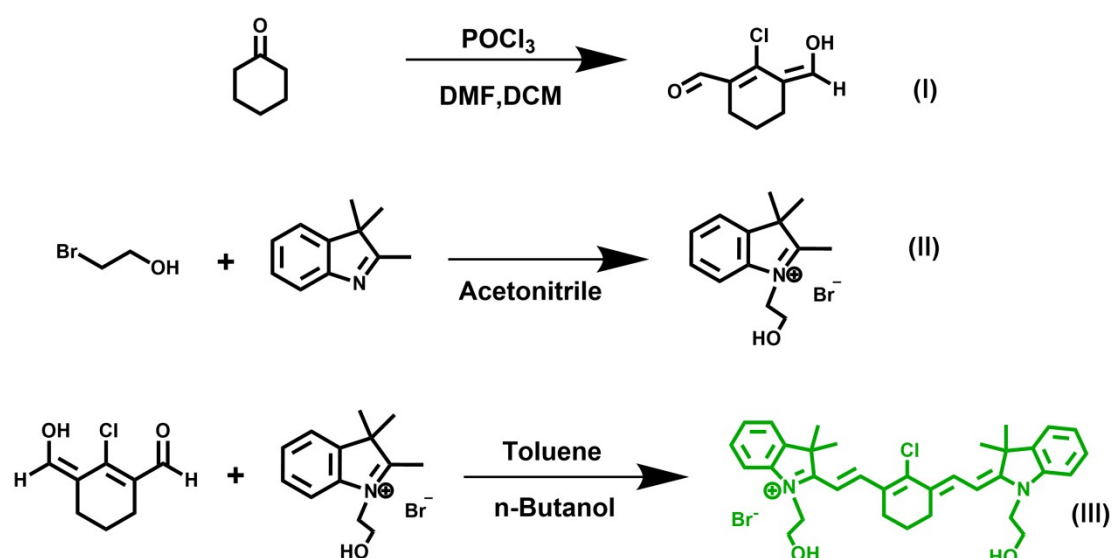

**Scheme S2.** Synthetic route of Cy.

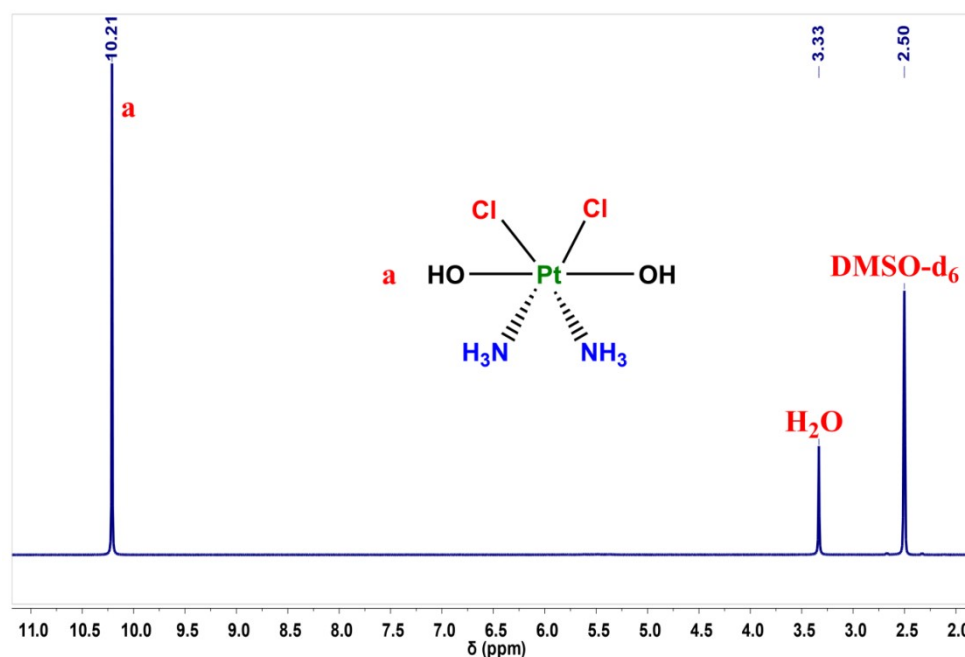

**Figure S1.**  $^1\text{H}$  NMR spectrum of DHP in  $\text{DMSO-d}_6$ .

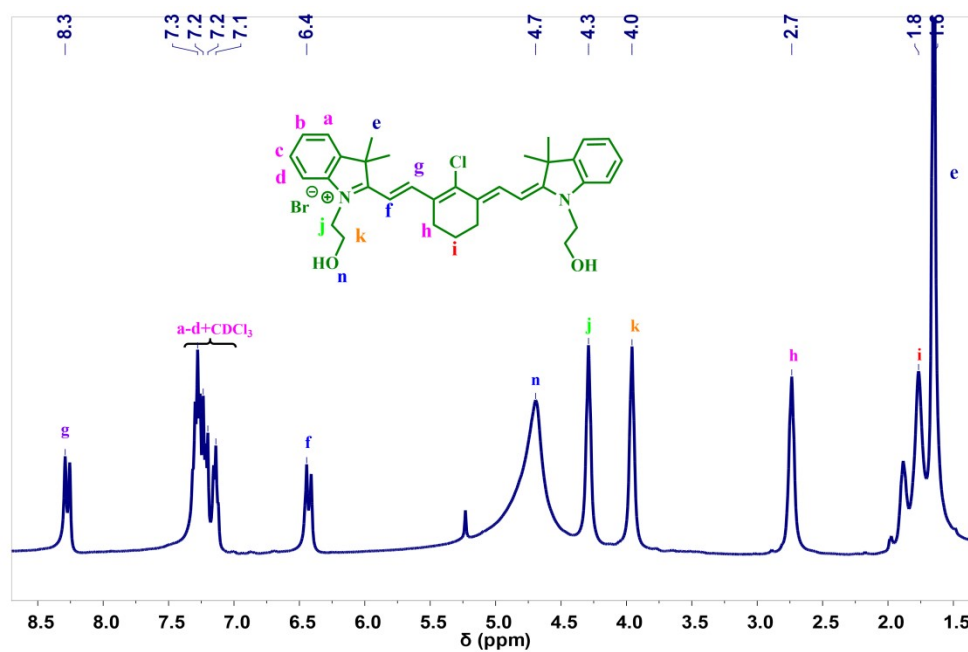

**Figure S2.**  $^1\text{H}$  NMR spectrum of Cy in  $\text{CDCl}_3$ .

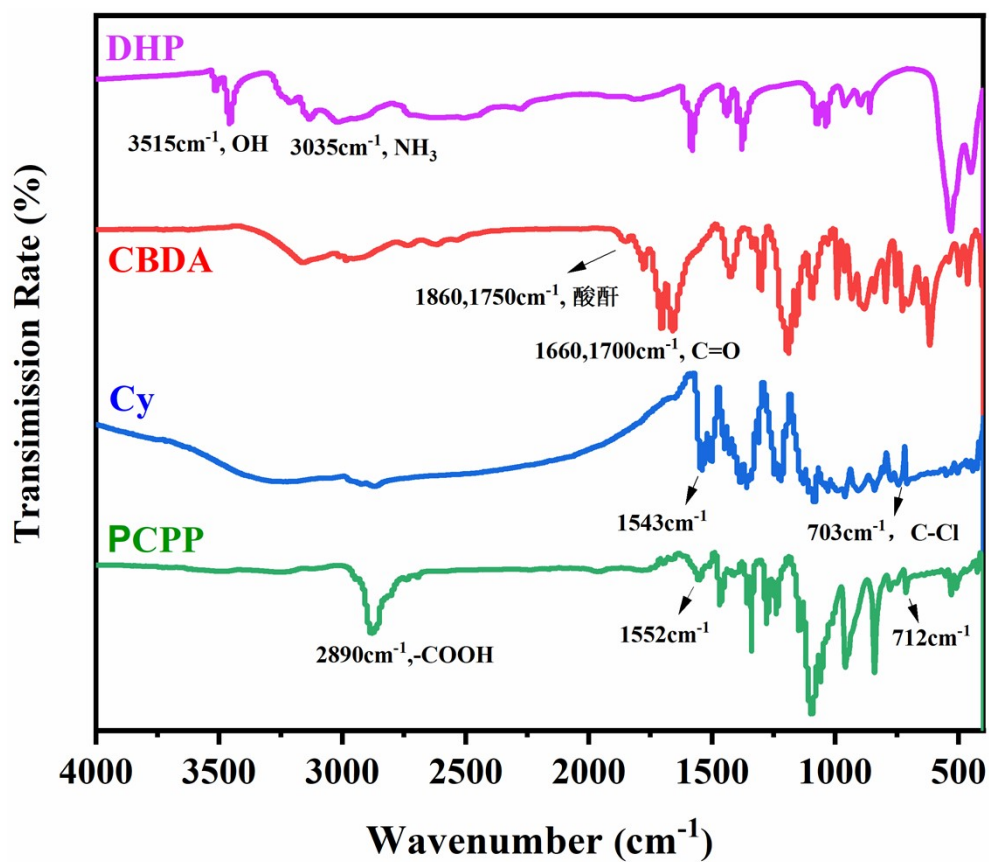

**Figure S3.** FT-IR spectrum of monomer (DHP, Cy, CBDA) and PCPP.

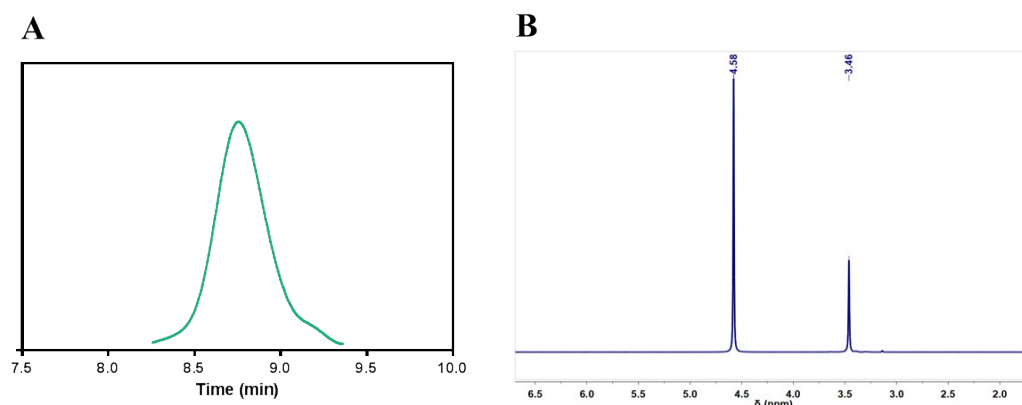

**Figure S4.** (A) GPC curve of PCPP (DMF as eluent), (B)  $^1\text{H}$  NMR spectrum of PCPP in  $\text{D}_2\text{O}$ .

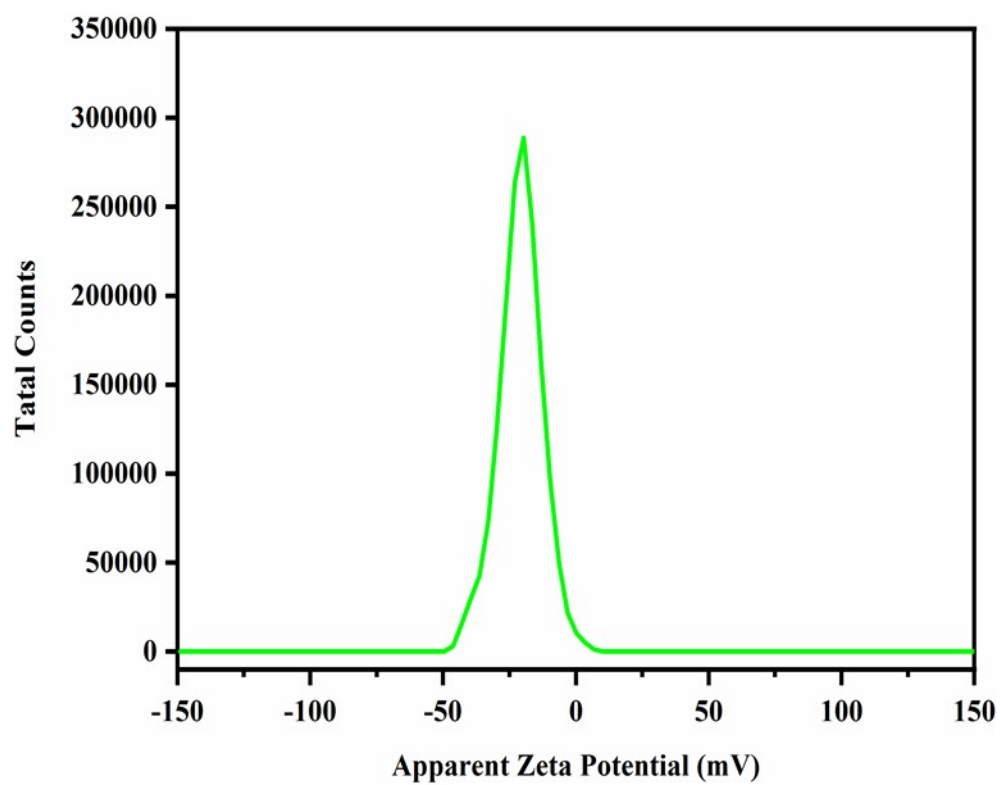

**Figure S5.** Zeta potential measurement of PCPP NPs.

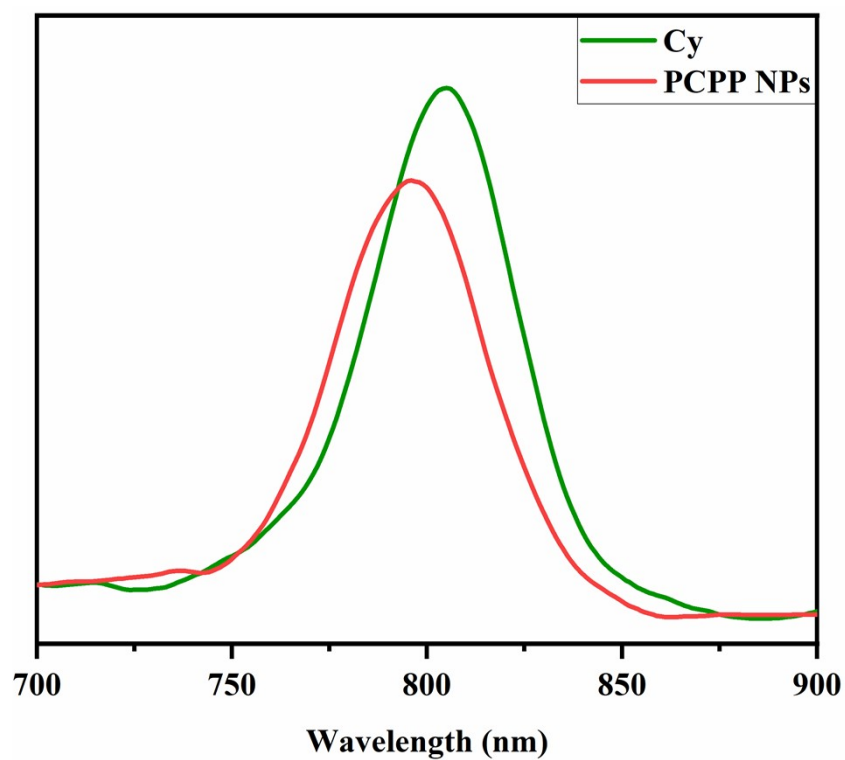

**Figure S6.** Fluorescence spectra of Cy and PCPP NPs.

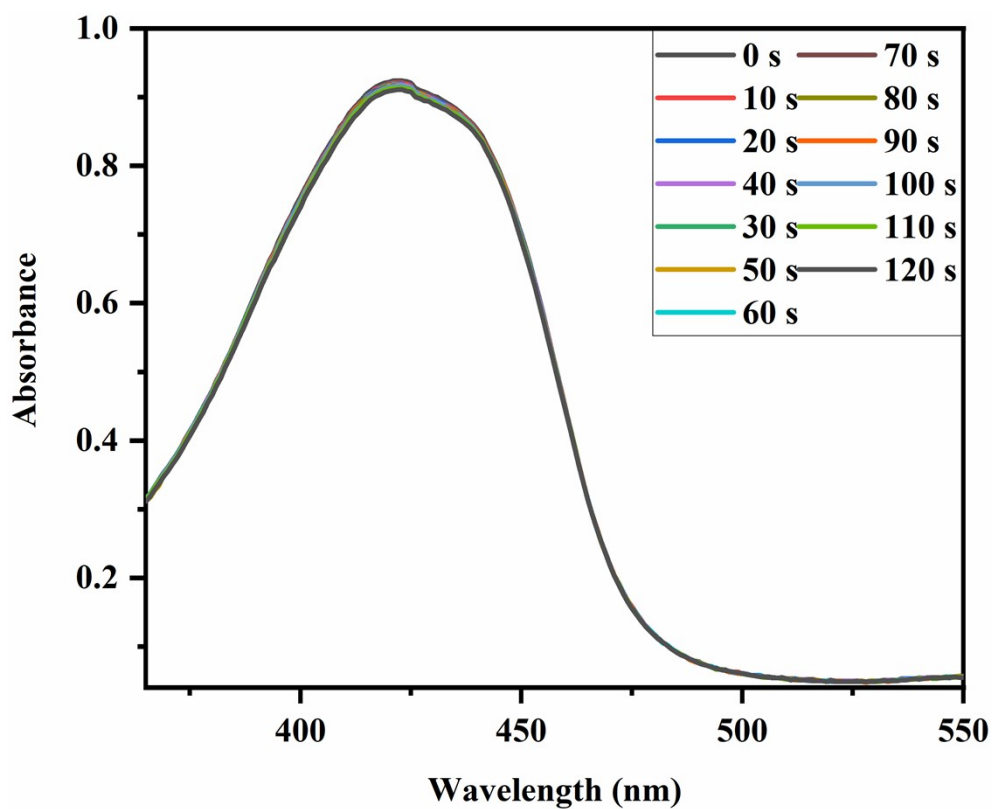

**Figure S7.** Absorption spectra of DPBF solution incubated with PCPP NPs in the dark.

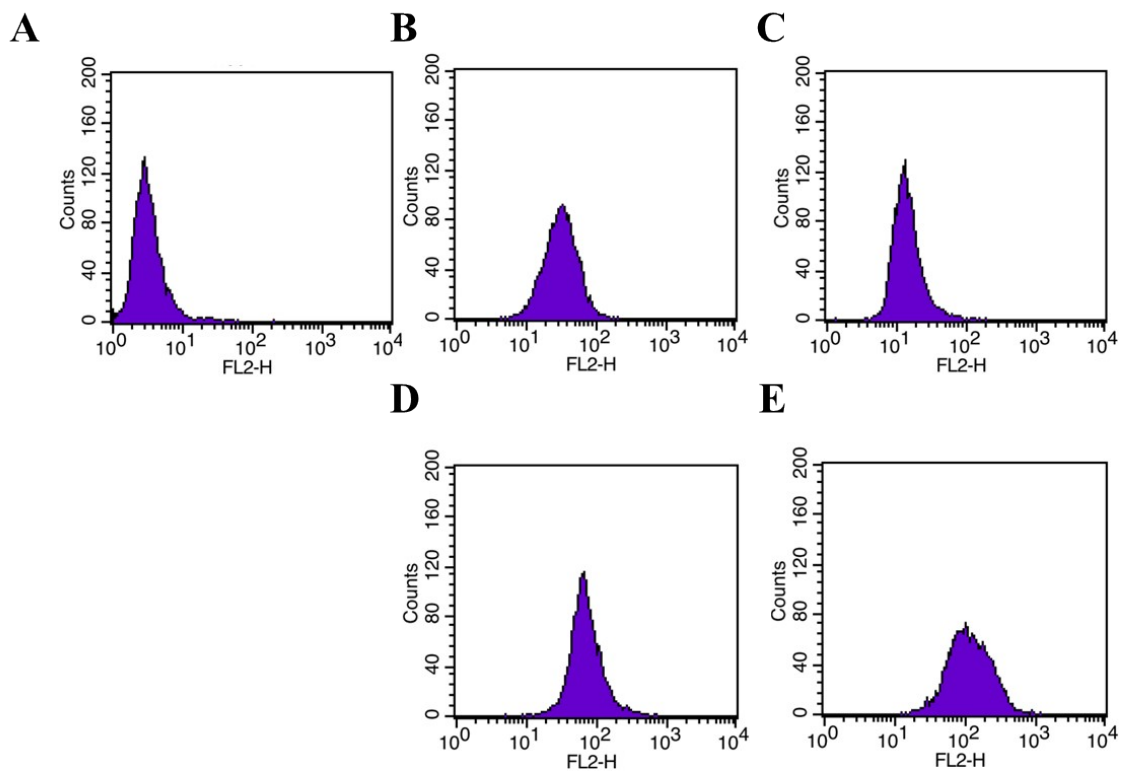

**Figure S8.** Flow cytometry (FCM) analyses of HeLa cells incubated with PCPP NPs and Cy for 4 h.

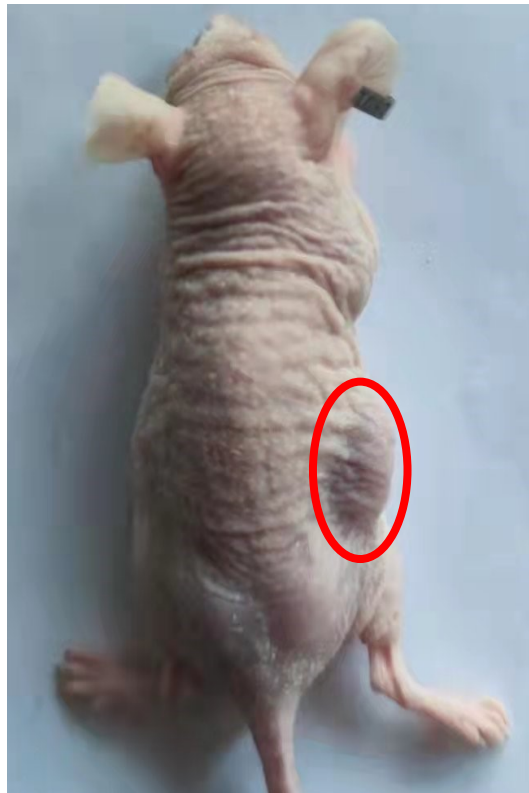

**Figure S9.** The H22-tumor-bearing BABL/c nude mice after injecting PCPP NPs for 24h.

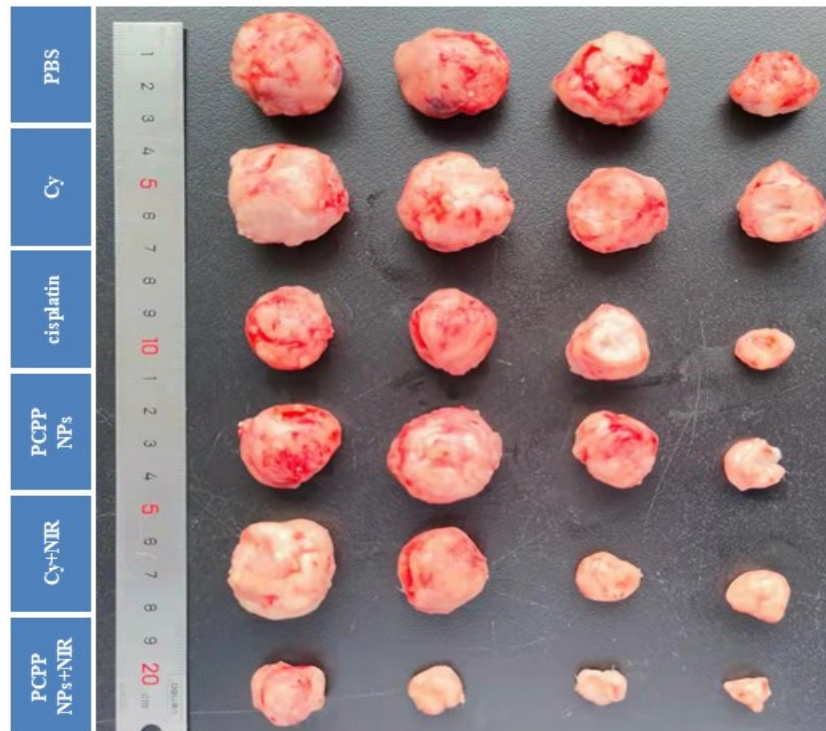

**Figure S10.** The isolated tumors of all euthanized H22-tumor-bearing KM mice.

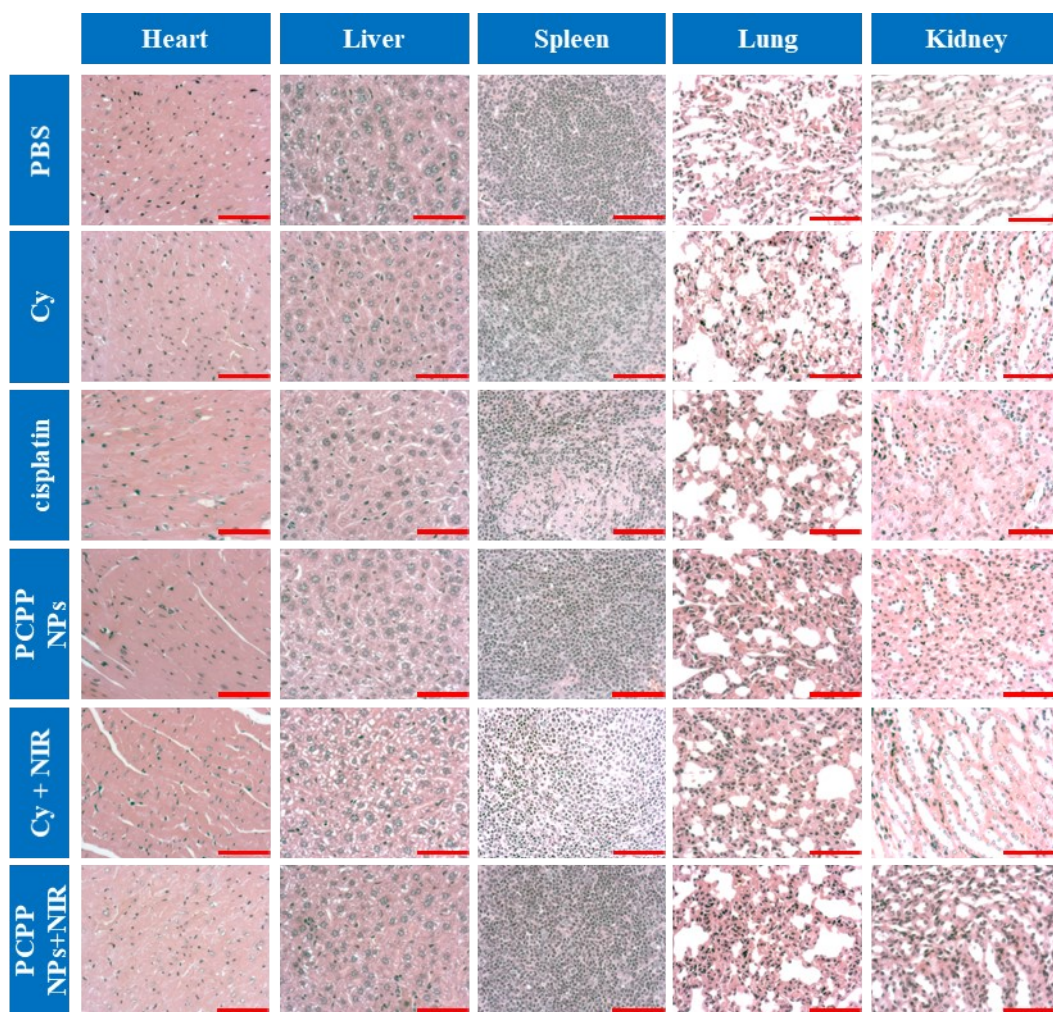

**Figure S11.** Typical H&E-stained slices of major organs tissues collected from different groups. Scale bar: 70  $\mu$ m.

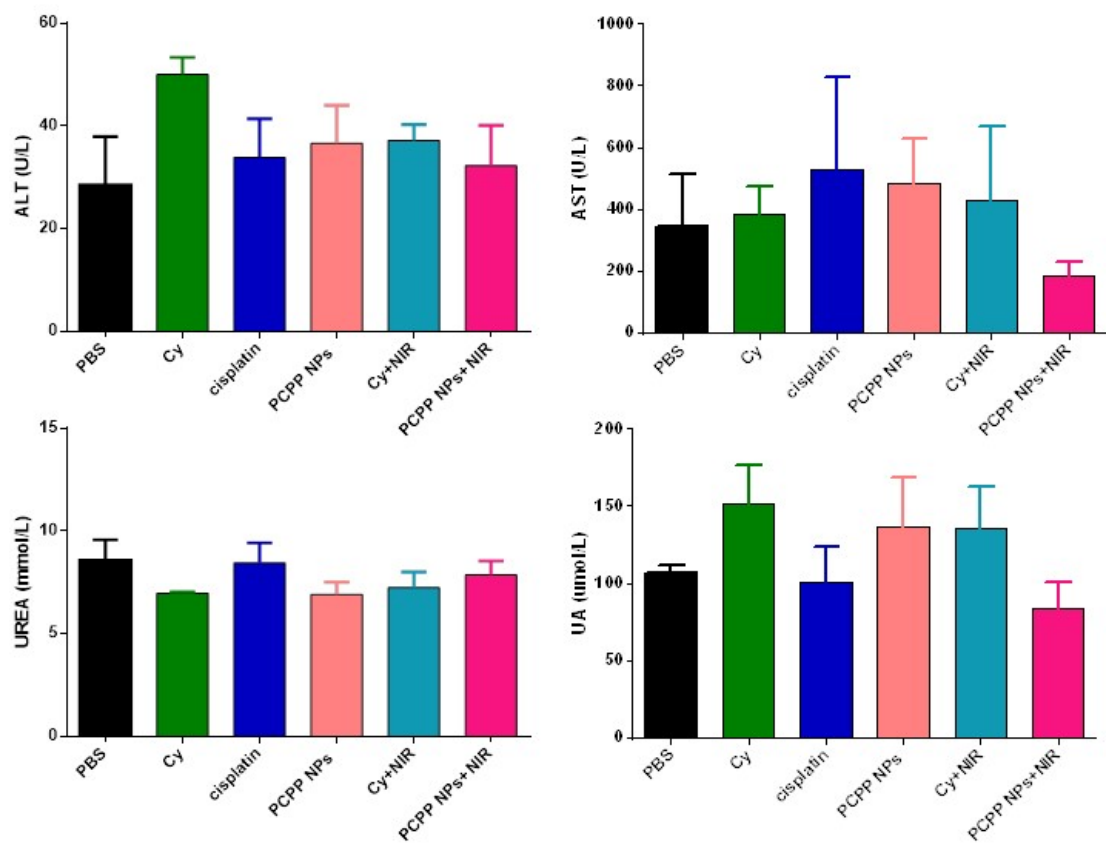

**Figure S12.** Blood biochemistry of different groups.
